# Supplementary material for: Fracture Mechanics and Oxygen Gas Barrier Properties of Al2O3/ZnO Nanolaminates on PET Deposited by Atomic Layer Deposition
Source: MDPI journal article supplement (doi:10.3390/nano9010088), 2019-01-11
Supplement: s1 [file s1]

# Supplementary Information

## 1. ALD Cycle Parameters

The total number of cycles was fixed at 1000 cycles for all the depositions. Single ZnO and Al<sub>2</sub>O<sub>3</sub> coatings were also deposited by using 1000 cycles and characterized as reference samples. The total film thicknesses of the Al<sub>2</sub>O<sub>3</sub>/ZnO nanolaminates were measured on fragments which delaminated from the PET substrate as a result of the tensile strain experiment. The bilayer thickness (one stack of Al<sub>2</sub>O<sub>3</sub> and ZnO) was calculated by dividing the total film thickness by the number of bilayers.

**Table S1.** ALD deposition sequences of investigated Al<sub>2</sub>O<sub>3</sub>/ZnO nanolaminates, total film thickness on PET as measured by SEM and resulting bilayer thicknesses.

| Samples                        | Number of Al <sub>2</sub> O <sub>3</sub> Cycles | Number of ZnO Cycles | Number of Bilayers | Total Thickness (nm) | Nominal Bilayer Thickness (nm) |
|--------------------------------|-------------------------------------------------|----------------------|--------------------|----------------------|--------------------------------|
| ZnO                            | 0                                               | 1000                 | 0                  | 210 ± 38             | single                         |
| Al <sub>2</sub> O <sub>3</sub> | 1000                                            | 0                    | 0                  | 200 ± 19             | single                         |
| 2 × 130 nm                     | 250                                             | 250                  | 2                  | 260 ± 22             | 130                            |
| 10 × 25 nm                     | 50                                              | 50                   | 10                 | 250 ± 26             | 25                             |
| 50 × 4.8 nm                    | 10                                              | 10                   | 50                 | 240 ± 29             | 4.8                            |

## 2. SEM Thickness Observations

SEM cross-section observations were performed using an emission field Hitachi S-4800 microscope on the films deposited on PET, for samples that had undergone the tensile testing. Light contrast comes from the ZnO material. ZnO films were measured as is, the Al<sub>2</sub>O<sub>3</sub> sample prepared by sputtering a thin (<10 nm) gold layer on top, and the nanolaminate samples were transferred to carbon tabs by pressing the sample against the conductive adhesive allowing the delaminated film to be electrically grounded to avoid charging during SEM observation.

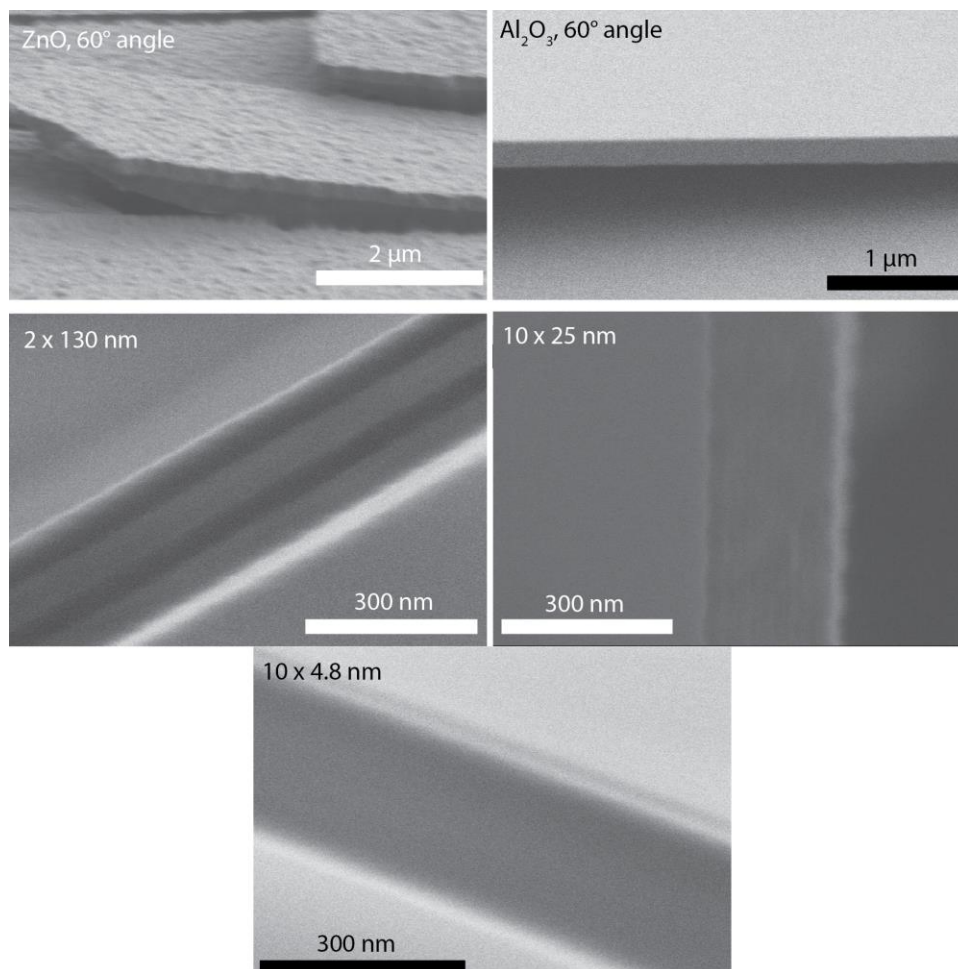

**Figure S1.** SEM cross-sections of coating fragments of the various nanolaminates after tensile experiments. Light contrast comes from the ZnO material single.

### 3. STEM Cross-Sections and Failure Analysis

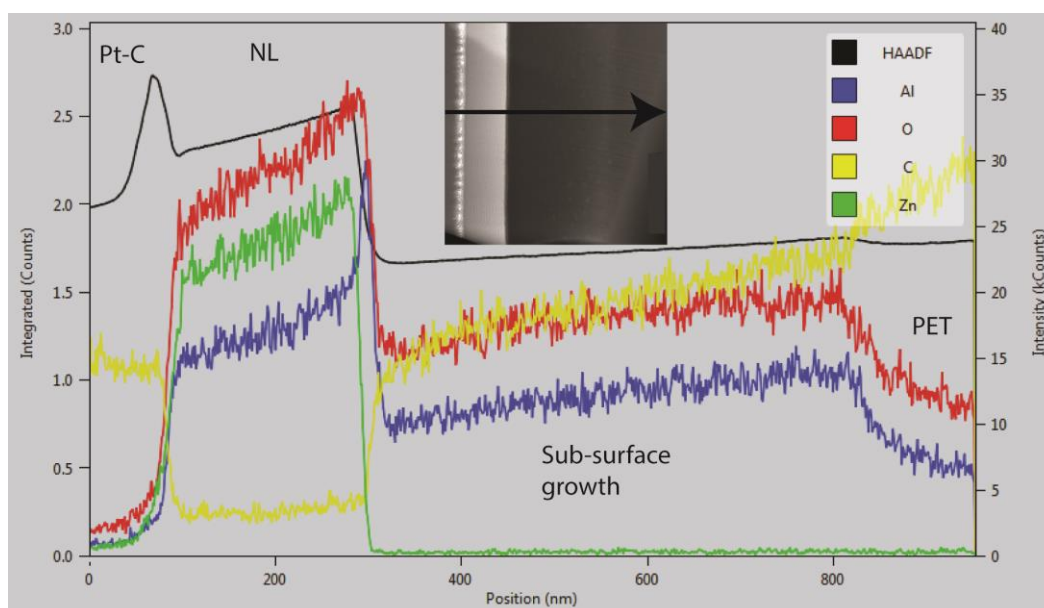

**Figure S2.** EDS line scan of 50 × 4.8 nm sample and sub-surface growth, shown in Figure 4b. The sub-surface growth contains Al, O, and C.

#### 4. Sample Data Obtained from Tensile Experiments

**Table S2.** Tensile experiment results for individual samples. The empty values represent ones that could not be accurately determined from the measurement data or Weibull fit. Uncertainties are listed after each value.

| ZnO/Sample<br>Acronym | COS<br>(%) | CD<br>(mm <sup>-1</sup> ) | Cohesive<br>Strain<br>(%) Film | ±<br>(%) | Cohesive<br>Strength<br>(MPa)<br>Film | ±<br>(MPa) | Interfacial<br>Shear<br>Stress<br>(MPa) | ±<br>(MPa) |
|-----------------------|------------|---------------------------|--------------------------------|----------|---------------------------------------|------------|-----------------------------------------|------------|
| S1                    | 0.817      | 143.5                     |                                |          |                                       |            |                                         |            |
| S3                    | 0.846      | 152.9                     | 1.06                           | 0.16     | 1540.67                               | 247.30     | 66.14                                   | 9.67       |
| S5                    |            | 137.2                     | 0.71                           | 0.82     | 1024.78                               | 1193.01    | 39.48                                   | 7.38       |
| S6                    |            | 146.6                     | 1.07                           | 0.61     | 1552.96                               | 905.84     | 63.92                                   | 10.87      |
| S7                    | 0.709      | 134.2                     | 1.17                           | 0.09     | 1690.54                               | 150.29     | 63.70                                   | 9.25       |
| S4                    | 0.689      | 137.2                     | 1.04                           | 0.45     | 1505.47                               | 663.36     | 57.99                                   | 9.19       |

  

| Al <sub>2</sub> O <sub>3</sub> | COS<br>(%) | CD<br>(mm <sup>-1</sup> ) | Cohesive<br>Strain<br>(%) Film | ±<br>(%) | Cohesive<br>Strength<br>(MPa)<br>Film | ±<br>(MPa) | Interfacial<br>Shear<br>Stress<br>(MPa) | ±<br>(MPa) |
|--------------------------------|------------|---------------------------|--------------------------------|----------|---------------------------------------|------------|-----------------------------------------|------------|
| S1                             | 0.514      |                           |                                |          |                                       |            |                                         |            |
| S3                             | 0.499      | 40                        | 1.18                           | 0.57     | 1935.03                               | 955.71     | 20.70                                   | 3.55       |
| S5                             | 0.486      | 41.6                      | 0.68                           | 0.39     | 1107.57                               | 647.72     | 12.32                                   | 1.92       |
| S6                             | 0.447      | 38.285                    | 0.76                           | 0.38     | 1239.89                               | 637.26     | 12.69                                   | 1.98       |
| S7                             |            | 34.95                     | 0.95                           | 0.25     | 1561.75                               | 417.54     | 14.60                                   | 2.17       |

  

| 2 × 130 nm | COS<br>(%) | CD<br>(mm <sup>-1</sup> ) | Cohesive<br>Strain<br>(%) Film | ±<br>(%) | Cohesive<br>Strength<br>(MPa)<br>Film | ±<br>(MPa) | Interfacial<br>Shear<br>Stress<br>(MPa) | ±<br>(MPa) |
|------------|------------|---------------------------|--------------------------------|----------|---------------------------------------|------------|-----------------------------------------|------------|
| S2         | 0.225      | 51.76                     | 0.51                           | 0.37     | 770.52                                | 570.02     | 13.86                                   | 2.12       |
| S3         | 0.837      | 70.5                      | 1.13                           | 0.80     | 1714.88                               | 1231.86    | 42.03                                   | 7.89       |
| S7         | 0.431      | 43.36                     |                                |          |                                       |            |                                         |            |
| S8         | 0.502      | 51.76                     | 0.55                           | 0.36     | 827.99                                | 550.65     | 14.90                                   | 2.27       |
| S9         | 0.366      | 49.56                     | 0.63                           | 0.43     | 955.24                                | 662.10     | 16.46                                   | 2.58       |

  

| 50 × 4.8 nm | COS<br>(%) | CD<br>(mm <sup>-1</sup> ) | Cohesive<br>Strain<br>(%) Film | ±<br>(%) | Cohesive<br>Strength<br>(MPa)<br>Film | ±<br>(MPa) | Interfacial<br>Shear<br>Stress<br>(MPa) | ±<br>(MPa) |
|-------------|------------|---------------------------|--------------------------------|----------|---------------------------------------|------------|-----------------------------------------|------------|
| S1          | 0.607      |                           |                                |          |                                       |            |                                         |            |
| S3          | 0.594      | 44.70                     | 1.50                           | 1.20     | 2111.20                               | 1710.63    | 30.28                                   | 6.71       |
| S44         | 0.482      | 49.67                     | 1.46                           | 0.32     | 2057.19                               | 466.13     | 32.79                                   | 6.70       |
| S4          | 0.655      | 52.04                     |                                |          |                                       |            |                                         |            |
| S5          | 0.476      | 36.05                     | 0.60                           | 0.11     | 840.02                                | 163.44     | 9.72                                    | 1.90       |

| $10 \times 25 \text{ nm}$ | COS<br>(%) | CD<br>( $\text{nm}^{-1}$ ) | Cohesive<br>Strain<br>(%) Film | $\pm$<br>(%) | Cohesive<br>Strength<br>(MPa)<br>Film | $\pm$<br>(MPa) | Interfacial<br>Shear<br>Stress<br>(MPa) | $\pm$<br>(MPa) |
|---------------------------|------------|----------------------------|--------------------------------|--------------|---------------------------------------|----------------|-----------------------------------------|----------------|
| S2                        | 0.722      | 33                         | 1.64                           | 1.90         | 2398.30                               | 2791.59        | 25.55                                   | 36.77          |
| S3                        | 0.49       | 32                         | 0.65                           | 0.63         | 949.91                                | 930.22         | 9.82                                    | 10.30          |
| S4                        | 0.615      | 39                         |                                |              |                                       |                |                                         |                |
| S5                        | 0.62       | 41                         |                                |              |                                       |                |                                         |                |
| S6                        | 0.563      | 43                         | 0.69                           | 0.46         | 1004.70                               | 683.25         | 13.94                                   | 7.90           |
| S7                        | 0.398      | 33                         |                                |              |                                       |                |                                         |                |
